# Supplementary material for: Association between Serum 25-Hydroxyvitamin D Level and Insulin Resistance in a Rural Population
Source: PubMed Central journal article supplement — Yonsei Med J. 2014 Jun 13;55(4):1036–41. doi: 10.3349/ymj.2014.55.4.1036 (PMC4075364; doi:10.3349/ymj.2014.55.4.1036), 2014-06-13
Supplement: ymj-55-1036-s001.pdf [file ymj-55-1036-s001.pdf]

**Supplementary Table 1. Association between Serum 25(OH)D Level (per 10 ng/mL) and Increased Insulin Resistance**

|                    | Total (n=807) |             | Men (n=324) |             | Women (n=483) |             |
|--------------------|---------------|-------------|-------------|-------------|---------------|-------------|
|                    | OR            | (95% CI)    | OR          | (95% CI)    | OR            | (95% CI)    |
| Unadjusted         | 0.99          | (0.86–1.14) | 0.93        | (0.75–1.15) | 1.13          | (0.92–1.38) |
| Multiple adjusted* | 1.06          | (0.91–1.24) | 1.02        | (0.80–1.29) | 1.14          | (0.92–1.42) |

OR, odds ratio; CI, confidence interval.

\*Adjusted for sex, age, body mass index, smoking status, alcohol intake, regular exercise, and menopausal status.
