# Supplementary material for: Association between Serum 25-Hydroxyvitamin D Level and Insulin Resistance in a Rural Population
Source: PubMed Central journal article supplement — Yonsei Med J. 2014 Jun 13;55(4):1036–41. doi: 10.3349/ymj.2014.55.4.1036 (PMC4075364; doi:10.3349/ymj.2014.55.4.1036), 2014-06-13
Supplement: ymj-55-1036-s002.pdf [file ymj-55-1036-s002.pdf]

**Supplementary Table 2. Characteristics of Study Participants by Vitamin D Concentrations**

| Variables                          | 25(OH)D    |            |            | <i>p</i> for trend  |
|------------------------------------|------------|------------|------------|---------------------|
|                                    | <20        | 20–30      | 30≤        |                     |
| Total (n=807)                      | 292        | 299        | 216        |                     |
| Age, yrs                           | 60.3±9.1   | 61.0±8.8   | 62.9±9.1   | 0.001*              |
| Body mass index, kg/m <sup>2</sup> | 24.3±3.0   | 24.9±3.1   | 24.1±3.1   | 0.525*              |
| 25(OH)D, ng/mL                     | 15.2±3.3   | 24.6±2.7   | 41.8±11.4  | N/A                 |
| Glucose <sup>†</sup>               | 4.6±0.2    | 4.6±0.2    | 4.6±0.2    | 0.281*              |
| Insulin <sup>†</sup>               | 1.9±0.4    | 2.0±0.4    | 1.9±0.5    | 0.063*              |
| HOMA-IR <sup>†</sup>               | 0.6±0.5    | 0.6±0.5    | 0.5±0.5    | 0.217*              |
| Diabetes mellitus                  | 43 (14.7)  | 43 (14.4)  | 40 (18.5)  | 0.275 <sup>‡</sup>  |
| HOMA-IR ≥2.5                       | 58 (19.9)  | 70 (23.4)  | 42 (19.4)  | 0.999 <sup>‡</sup>  |
| Current smoker                     | 19 (6.5)   | 26 (8.7)   | 29 (13.4)  | 0.009 <sup>‡</sup>  |
| Current alcohol drinker            | 88 (30.1)  | 119 (39.8) | 108 (50.0) | <0.001 <sup>‡</sup> |
| Regular exercise                   | 128 (43.8) | 139 (46.5) | 87 (40.3)  | 0.490 <sup>‡</sup>  |
| Men (n=324)                        | 77         | 118        | 129        |                     |
| Age, yrs                           | 63.5±9.1   | 62.6±8.3   | 64.1±8.7   | 0.603*              |
| Body mass index, kg/m <sup>2</sup> | 24.5±2.6   | 24.5±3.0   | 24.0±2.7   | 0.245*              |
| 25(OH)D, ng/mL                     | 16.2±2.7   | 24.9±2.9   | 43.1±12.4  | N/A                 |
| Glucose <sup>†</sup>               | 4.7±0.2    | 4.6±0.2    | 4.7±0.2    | 0.694*              |
| Insulin <sup>†</sup>               | 1.9±0.4    | 1.9±0.4    | 1.8±0.4    | 0.098*              |
| HOMA-IR <sup>†</sup>               | 0.6±0.5    | 0.5±0.5    | 0.5±0.5    | 0.129*              |
| Diabetes mellitus                  | 19 (24.7)  | 17 (14.4)  | 29 (22.5)  | 0.939 <sup>‡</sup>  |
| HOMA-IR ≥2.5                       | 15 (19.5)  | 22 (18.6)  | 23 (17.8)  | 0.765 <sup>‡</sup>  |
| Current smoker                     | 15 (19.5)  | 24 (20.3)  | 29 (22.5)  | 0.590 <sup>‡</sup>  |
| Current alcohol drinker            | 36 (46.8)  | 71 (60.2)  | 85 (65.9)  | 0.009 <sup>‡</sup>  |
| Regular exercise                   | 34 (44.2)  | 60 (50.9)  | 53 (41.1)  | 0.512 <sup>‡</sup>  |
| Women (n=483)                      | 215        | 181        | 87         |                     |
| Age, yrs                           | 59.1±8.9   | 60.0±9.0   | 61.1±9.5   | 0.092*              |
| Body mass index, kg/m <sup>2</sup> | 24.2±3.2   | 25.1±3.2   | 24.3±3.6   | 0.833*              |
| 25(OH)D, ng/mL                     | 14.8±3.4   | 24.4±2.7   | 39.7±9.5   | N/A                 |
| Glucose <sup>†</sup>               | 4.6±0.1    | 4.6±0.2    | 4.6±0.2    | 0.882*              |
| Insulin <sup>†</sup>               | 2.0±0.4    | 2.1±0.4    | 1.9±0.5    | 0.921*              |
| HOMA-IR <sup>†</sup>               | 0.5±0.5    | 0.7±0.4    | 0.5±0.5    | 0.891*              |
| Diabetes mellitus                  | 24 (11.2)  | 26 (14.4)  | 11 (12.6)  | 0.561 <sup>‡</sup>  |
| HOMA-IR ≥2.5                       | 43 (20.0)  | 48 (26.5)  | 19 (21.8)  | 0.453 <sup>‡</sup>  |
| Current smoker                     | 4 (1.9)    | 2 (1.1)    | 0 (0.0)    | 0.184 <sup>‡</sup>  |
| Current alcohol drinker            | 52 (24.2)  | 48 (26.5)  | 23 (26.4)  | 0.614 <sup>‡</sup>  |
| Regular exercise                   | 94 (43.7)  | 79 (43.7)  | 34 (39.1)  | 0.526 <sup>‡</sup>  |

HOMA-IR, homeostasis model assessment for insulin resistance.

\**p* for trend was derived from a general linear model using contrast coefficients for linear trend analysis.

<sup>†</sup>Analyzed with log-transformed values.

<sup>‡</sup>*p* for trend was derived from the Cochran-Armitage trend test.
