# Supplementary material for: Association between Serum 25-Hydroxyvitamin D Level and Insulin Resistance in a Rural Population
Source: PubMed Central journal article supplement — Yonsei Med J. 2014 Jun 13;55(4):1036–41. doi: 10.3349/ymj.2014.55.4.1036 (PMC4075364; doi:10.3349/ymj.2014.55.4.1036), 2014-06-13
Supplement: ymj-55-1036-s003.pdf [file ymj-55-1036-s003.pdf]

**Supplementary Table 3. Adjusted OR (95% CI) of Adults Having Insulin Resistance by Vitamin D Concentrations**

|                    | 25(OH)D (ng/mL)  |                  |               | <i>p</i> for trend |
|--------------------|------------------|------------------|---------------|--------------------|
|                    | <20              | 20-30            | ≤30           |                    |
| Total, cases/n (%) | 58/292 (19.9)    | 70/299 (23.4)    | 43/216 (19.4) |                    |
| Unadjusted         | 0.94 (0.59-1.49) | 1.20 (0.78-1.86) | 1.00 (ref)    | 0.788              |
| Model 1            | 0.96 (0.61-1.52) | 1.22 (0.79-1.89) | 1.00 (ref)    | 0.855              |
| Model 2            | 0.91 (0.56-1.48) | 1.02 (0.64-1.63) | 1.00 (ref)    | 0.714              |
| Men, cases/n (%)   | 15/77 (19.5)     | 22/118 (18.6)    | 23/129 (17.8) |                    |
| Unadjusted         | 1.12 (0.54-2.30) | 1.06 (0.55-2.02) | 1.00 (ref)    | 0.768              |
| Model 1            | 1.10 (0.53-2.27) | 1.02 (0.53-1.95) | 1.00 (ref)    | 0.802              |
| Model 2            | 0.91 (0.42-1.97) | 0.80 (0.40-1.61) | 1.00 (ref)    | 0.816              |
| Women, cases/n (%) | 43/215 (20.0)    | 48/181 (26.5)    | 19/87 (21.8)  |                    |
| Unadjusted         | 0.90 (0.49-1.64) | 1.29 (0.70-2.37) | 1.00 (ref)    | 0.720              |
| Model 1            | 0.95 (0.52-1.76) | 1.34 (0.73-2.48) | 1.00 (ref)    | 0.875              |
| Model 2            | 0.93 (0.48-1.77) | 1.14 (0.60-2.18) | 1.00 (ref)    | 0.815              |

OR, odds ratio; CI, confidence interval.

Model 1: adjusted for age. Model 2: adjusted for age, body mass index, smoking status, alcohol intake, regular exercise, and menopausal status. In total, three models were additionally adjusted for sex.
