# Supplementary material for: Association between Serum 25-Hydroxyvitamin D Level and Insulin Resistance in a Rural Population
Source: PubMed Central journal article supplement — Yonsei Med J. 2014 Jun 13;55(4):1036–41. doi: 10.3349/ymj.2014.55.4.1036 (PMC4075364; doi:10.3349/ymj.2014.55.4.1036), 2014-06-13
Supplement: ymj-55-1036-s004.pdf [file ymj-55-1036-s004.pdf]

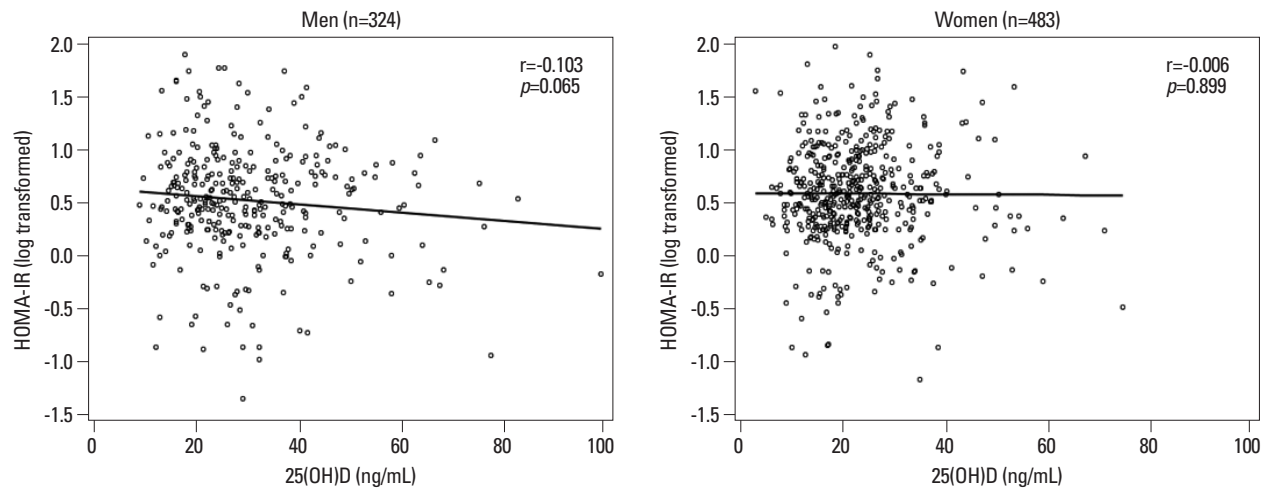

**Supplementary Fig. 1.** Association between serum 25(OH)D level and HOMA-IR. HOMA-IR, homeostasis model assessment for insulin resistance.
